# Supplementary figures and images for: Inhibition in the auditory brainstem enhances signal representation and regulates gain in complex acoustic environments
Source: eLife journal article supplement (doi:10.7554/elife.19295), 2016-11-18

# A ANF input vs. experimental and simulated SBC output

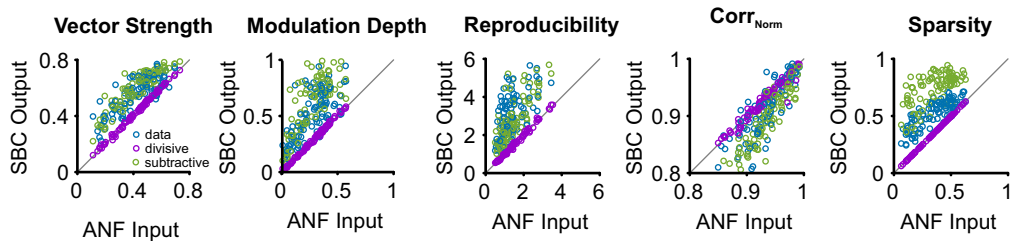

# B difference to ANF input

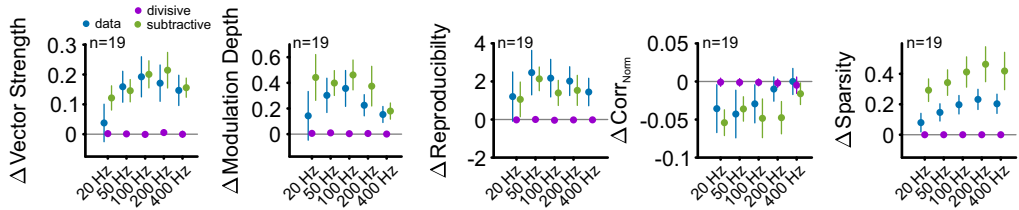

Supplement: supp [file elife-19295-supp-v1.zip]

ii

iii

**iv** *block of inhibition*

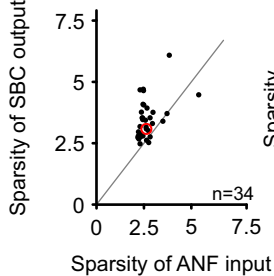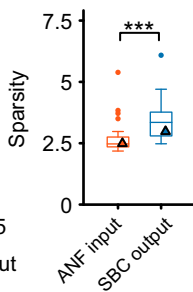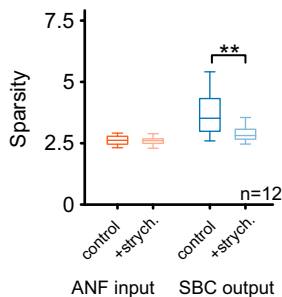

**Bi** *close-to-silence index*

ii

iii

**iv** *block of inhibition*

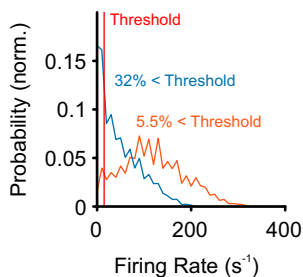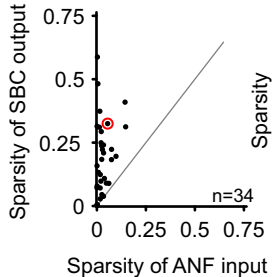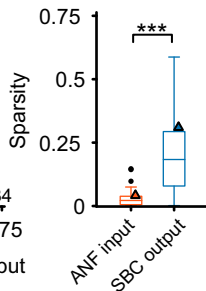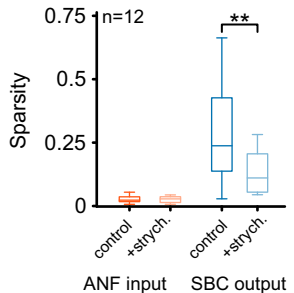

Supplement: supp [file elife-19295-supp-v1.zip]

# A ANF input vs. experimental and simulated SBC output

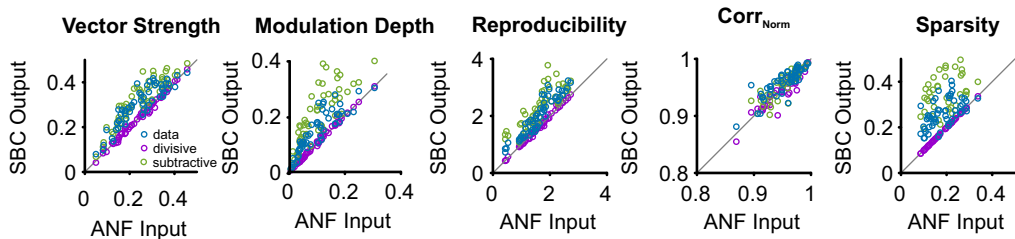

# B difference to ANF input

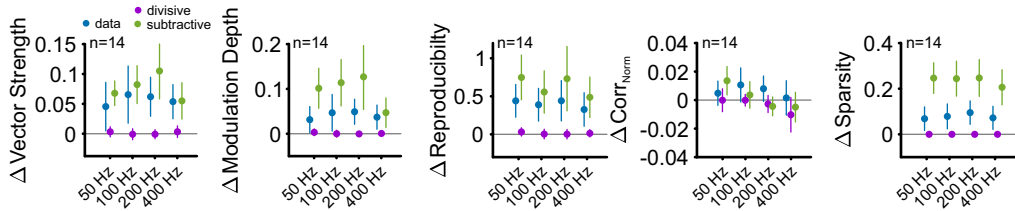

Supplement: supp [file elife-19295-supp-v1.zip]
